# Supplementary material
Source: PubMed Central journal article supplement (PMC3887904)

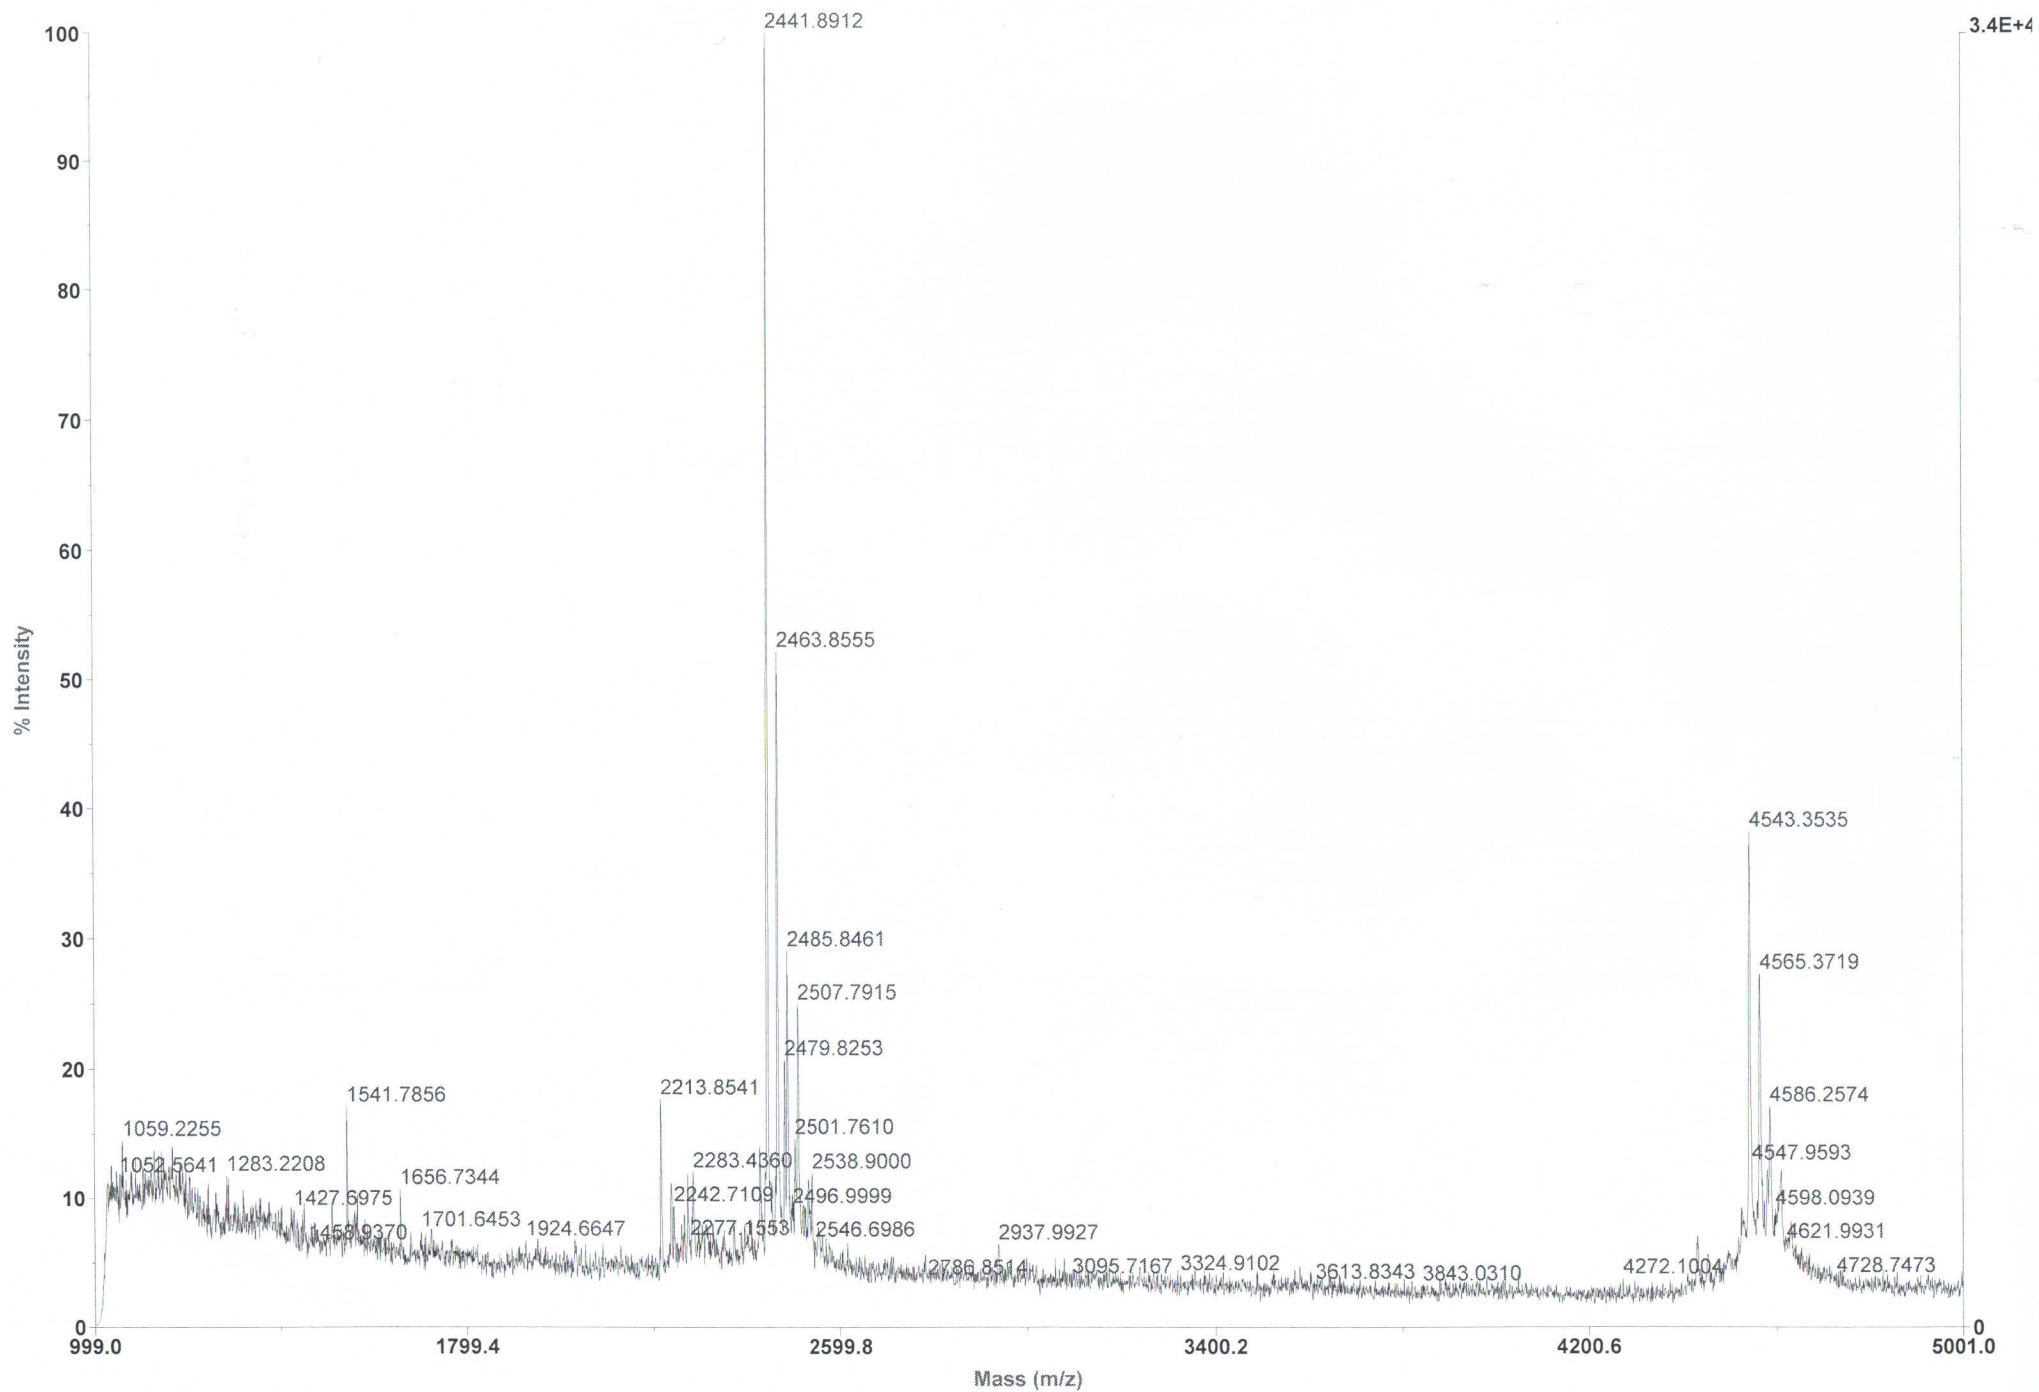

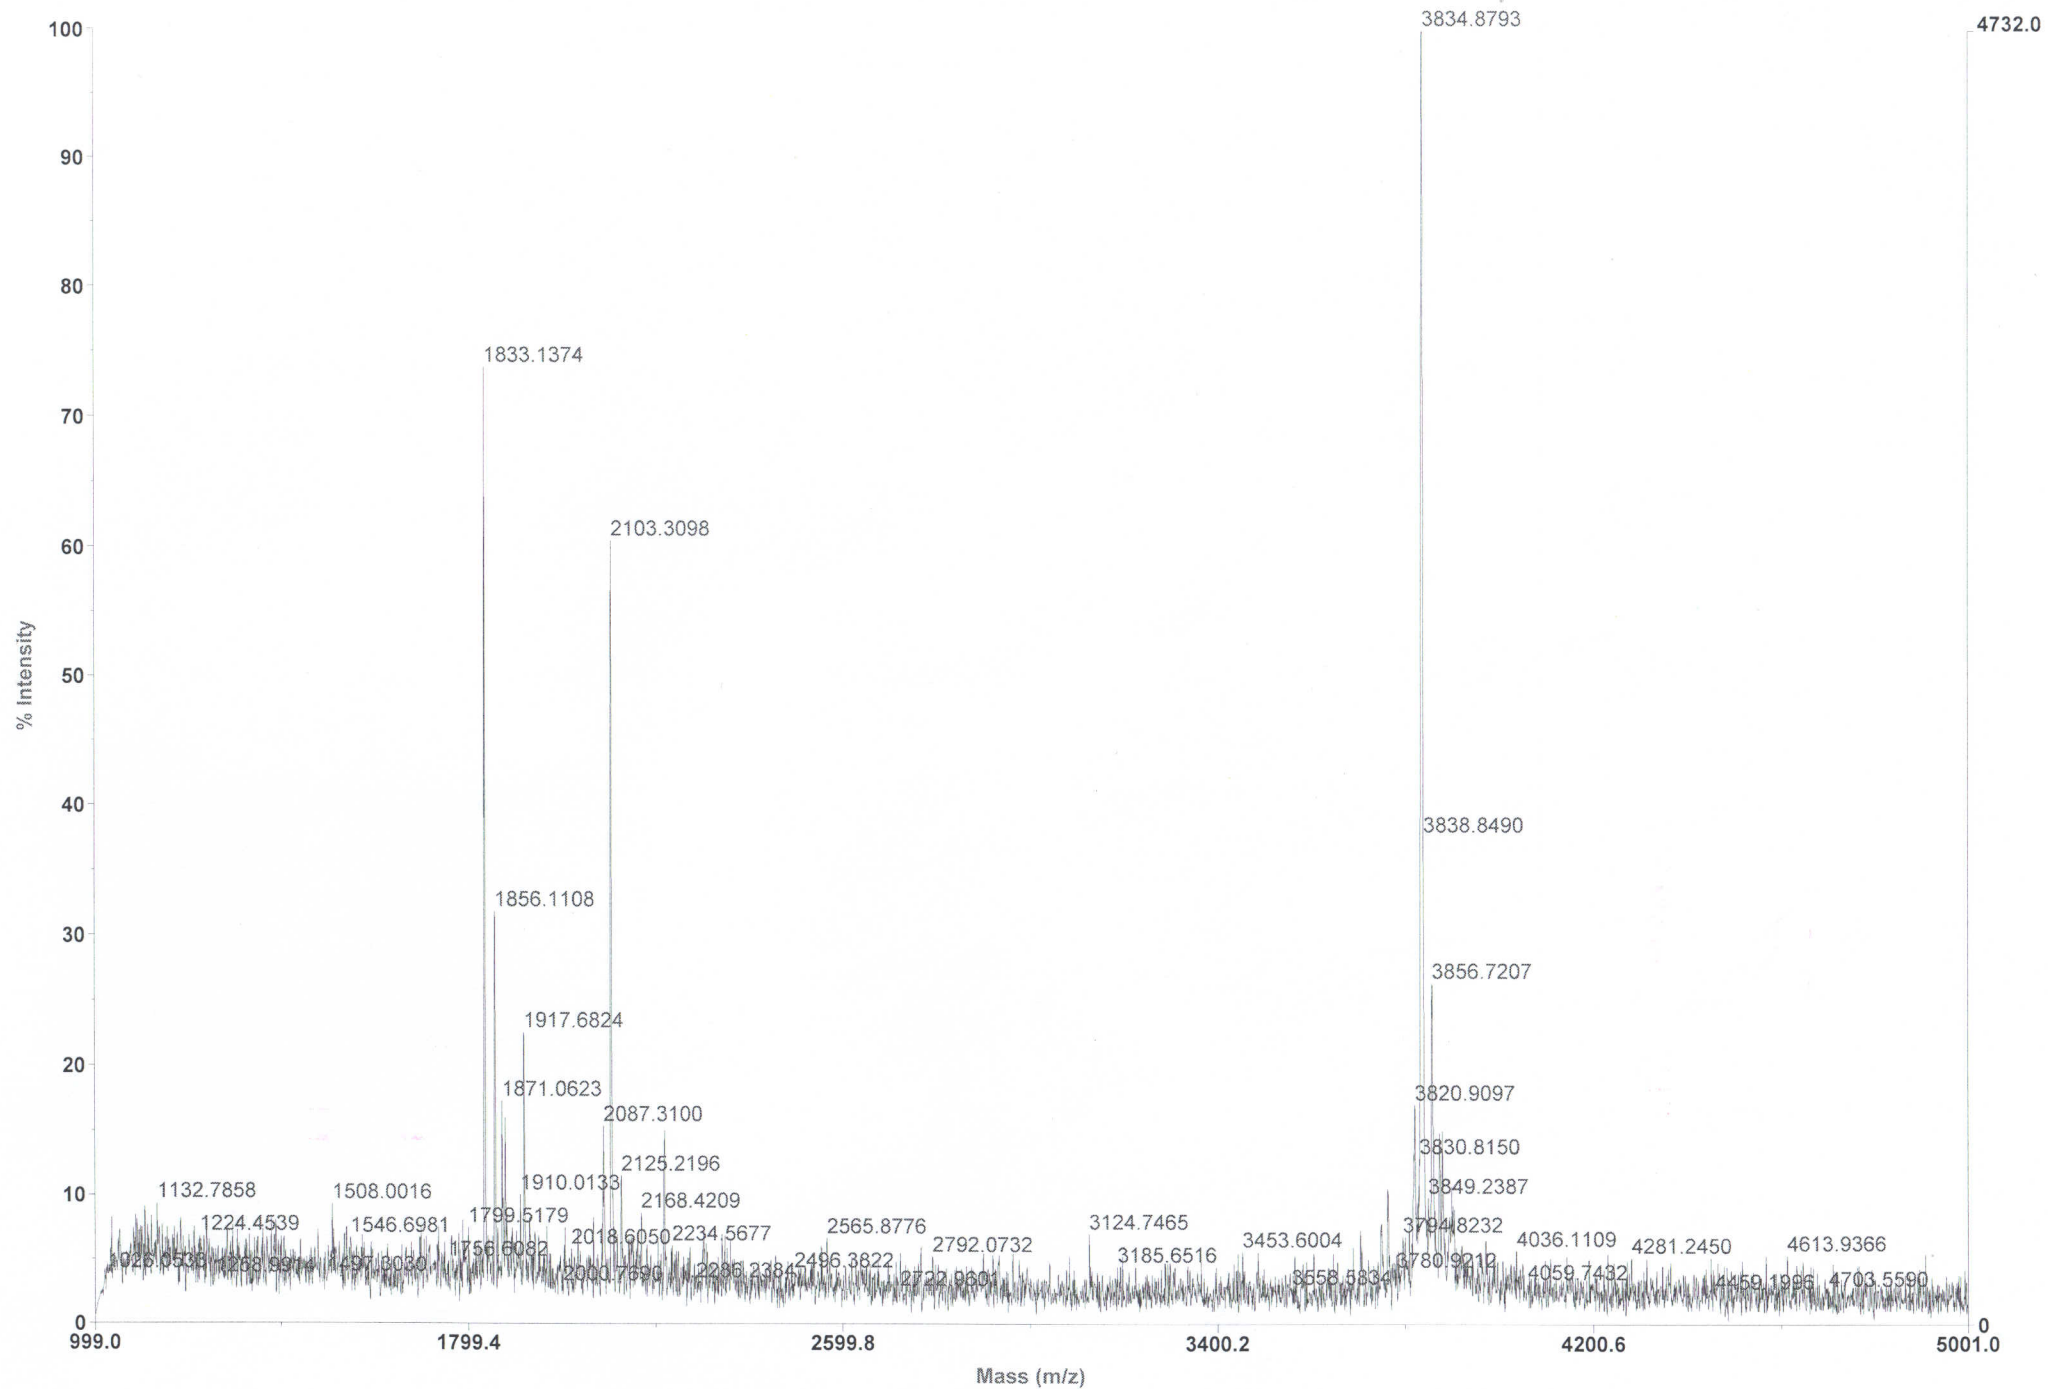

Supplement: molcell-35-2-106-4-supplementary.pdf [file molcell-35-2-106-4-supplementary.pdf]
